# Supplementary material
Source: PubMed Central journal article supplement (PMC2806756)
Supplement: 0908946107_pnas.200908946SI.pdf [file 0908946107_pnas.200908946SI.pdf]

# Supporting Information

Jankovic et al. 10.1073/pnas.0908946107

Table S1. *Igβ/IgH* translocation breakpoints

|     |                                                              |
|-----|--------------------------------------------------------------|
| Igβ | GAAGTGGTGGCTGAGGCAACTAACCT                                   |
| 1-3 | GAAGTGGTGGCTGAGGCAACTAACCT <u>ACCTGAGGAGACGGTGACTGAGG</u>    |
| IgH | TACCTGAGGAGACGGTGACTGAGG                                     |
| Igβ | TGAAGAGGATGATGAGGAGGGTCTGG                                   |
| 0-9 | TGAAGAGGATGATGAGGAGGGTCTGG <u>CTGGCTGTTGAGATGGTTCGGGATGA</u> |
| IgH | CTGGCTGTTGAGATGGTTCGGGATGA                                   |
| Igβ | GCTGGACAGCTGTCGCTCTCATCAGA                                   |
| 3-2 | GCTGGACAGCTGTCGCTCTCATCAGA <b>AGGGGTGAGCTGAGCTGGGCTGA</b>    |
| IgH | TGAGCTGAGCTGGGCTGA                                           |
| Igβ | ACATCCAGTACGAGGATAATGGTATCT                                  |
| 1-5 | ACATCCAGTACGAGGATAATGGTATCTGAGCTGGGGTCAGCTGAGCAAG            |
| IgH | CTGAGCTGGGGTCAGCTGAGCAAG                                     |
| Igβ | CAGATCTGGCAGCACCCGAGGTTTGACAGC                               |
| 3-5 | CAGATCTGGCAGCACCCGAGGTTTGACAGCTGAGCTGGGTGAGCTGAGCT           |
| IgH | AGCTGAGCTGGGTGAGCTGAGCT                                      |
| Igβ | CCTTCTCATACTCTACTGACTGCCT                                    |
| 4-5 | CCTTCTCATACTCTACTGACTGCCT <b>AGGGGGT</b> GAGCTGAGCTGAGCT     |
| IgH | TGAGCTGAGCTGAGCT                                             |
| Igβ | AGGACAGTGCTAGAGGGGAGCCCAAGG                                  |
| 7-5 | AGGACAGTGCTAGAGGGGAGCCCAAGGGGCATGAACACCCGTTCTC               |
| IgH | AGGGGCATGAACACCCGTTCTC                                       |
| Igβ | AGCCATCCACCCACTCCCCAGCTCAGG                                  |
| 5-5 | AGCCATCCACCCACTCCCCAGCTCAGGTTGAATAGAGCTAAACTCTA              |
| IgH | AGGTTGAATAGAGCTAAACTCTA                                      |
| Igβ | ACCTTCTCATACTCTACTGACTGCCT                                   |
| 5-5 | ACCTTCTCATACTCTACTGACTGCCT <b>AGGGGGT</b> GAGCTGAGCTGAGCT    |
| IgH | GGGGTGAGCTGAGCTGAGCT                                         |

Translocations were cloned from wild-type B cells stimulated with LPS and IL4. Breakpoint sequences are shown (middle), with the homology to germline Igβ (top sequence) and IgH S<sub>μ</sub> (bottom sequence). Insertions are set in bold; microhomologies are underlined.
